# Supplementary material for: In situ surface reduction for accessing atomically dispersed platinum on carbon sheets for acidic hydrogen evolution
Source: Royal Society of Chemistry journal article supplement (doi:10.1039/d1nr05199g), 2021-01-01
Supplement: d1nr05199g1.pdf [file d1nr05199g1.pdf]

## Supporting Information

### **In-situ Surface Reduction to Accessing Atomically Dispersed Platinum on Carbon Sheets for Acidic Hydrogen Evolution**

Weiwei Quan<sup>abc§</sup>, Xinglin Ruan<sup>d§</sup>, Yingbin Lin<sup>abc</sup>, Jiewei Luo<sup>e\*</sup>, Yiyin Huang<sup>abc\*</sup>

<sup>a</sup> Fujian Provincial Key Laboratory of Quantum Manipulation and New Energy Materials, College of Physics and Energy, Fujian Normal University, Fuzhou, Fujian, 350117, China

<sup>b</sup> Fujian Provincial Engineering Technology Research Center of Solar Energy Conversion and Energy Storage, Fuzhou, 350117, China

<sup>c</sup> Fujian Provincial Collaborative Innovation Center for Advanced High-Field Superconducting Materials and Engineering, Fuzhou, 350117, China

<sup>d</sup> Department of Neurology, Fujian Medical University Union Hospital, 29 Xinquan Road Gulou District, Fuzhou 350001, China

<sup>e</sup> Shengli Clinical Medical College of Fujian Medical University, Fuzhou 350001, China

Email: [hyy@fjnu.edu.cn](mailto:hyy@fjnu.edu.cn)

*§ These authors contributed equally to this work.*

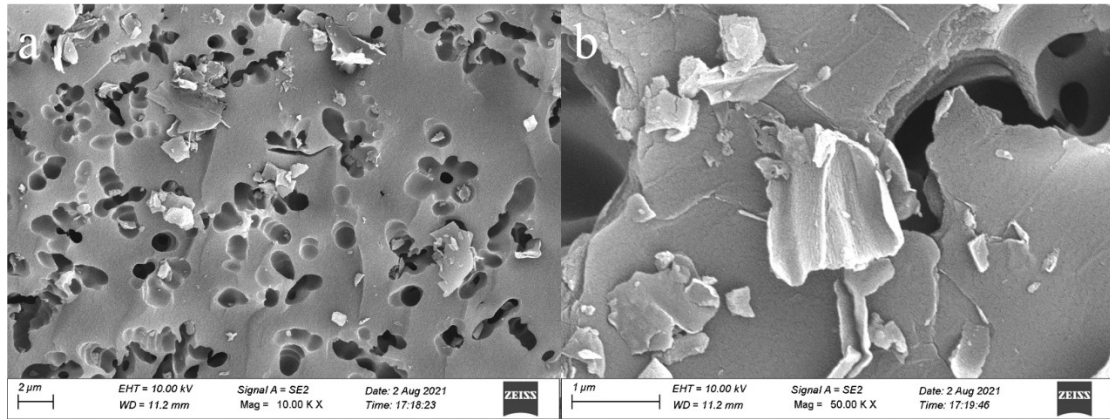

**Figure 1.** (a) Low and (b) high magnification scanning electron microscopy (SEM) images of the synthetic Pt-DC material.

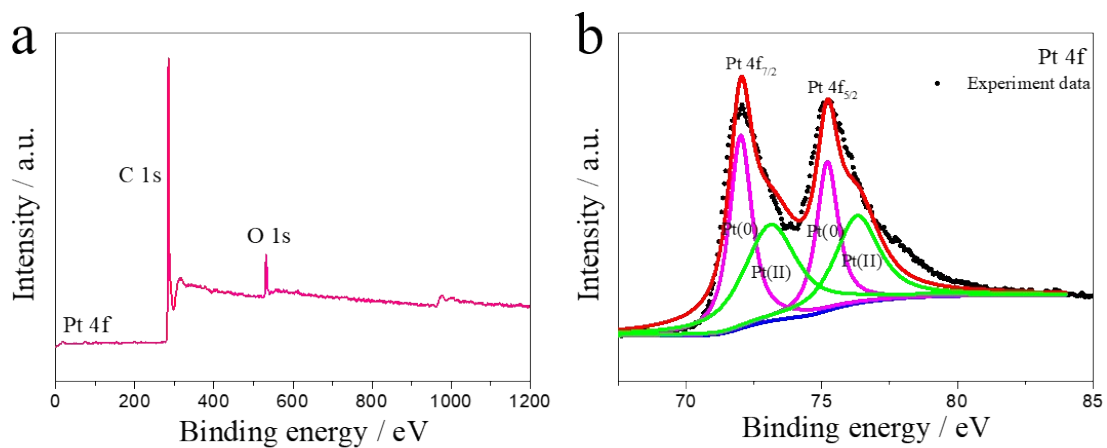

**Figure 2.** (a) Survey X-ray photoelectron spectroscopy (XPS) of the synthetic Pt-DC material. (b) The Pt 4f region of the XPS for Pt/C (JM) sample.

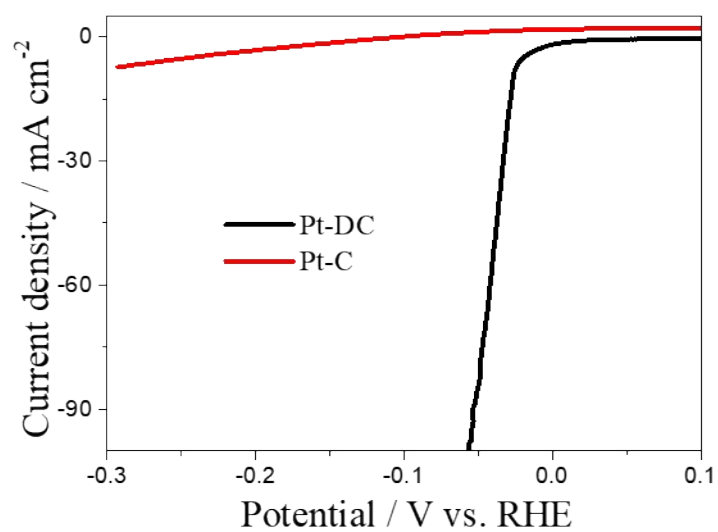

**Figure 3.** Linear sweep voltammetry (LSV) with  $iR$  compensation at a scan rate of 10 mV/s in 0.5 M  $H_2SO_4$  electrolyte for the Pt-DC catalyst compared to the Pt-C catalyst.

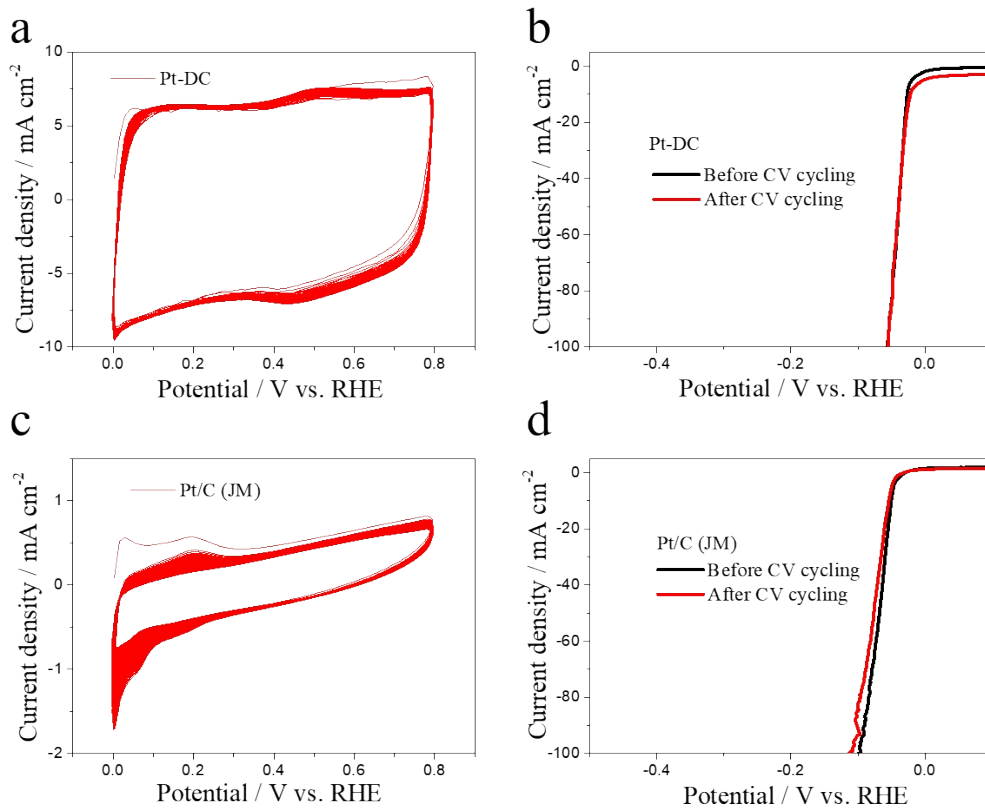

**Figure 4.** (a and c) Long-term cyclic voltammetry (2000 cycles) tests for Pt-DC and Pt/C (JM) catalysts in 0.5 M H<sub>2</sub>SO<sub>4</sub> electrolyte, and (b and d) the LSV curves with iR compensation before and after the CV tests.

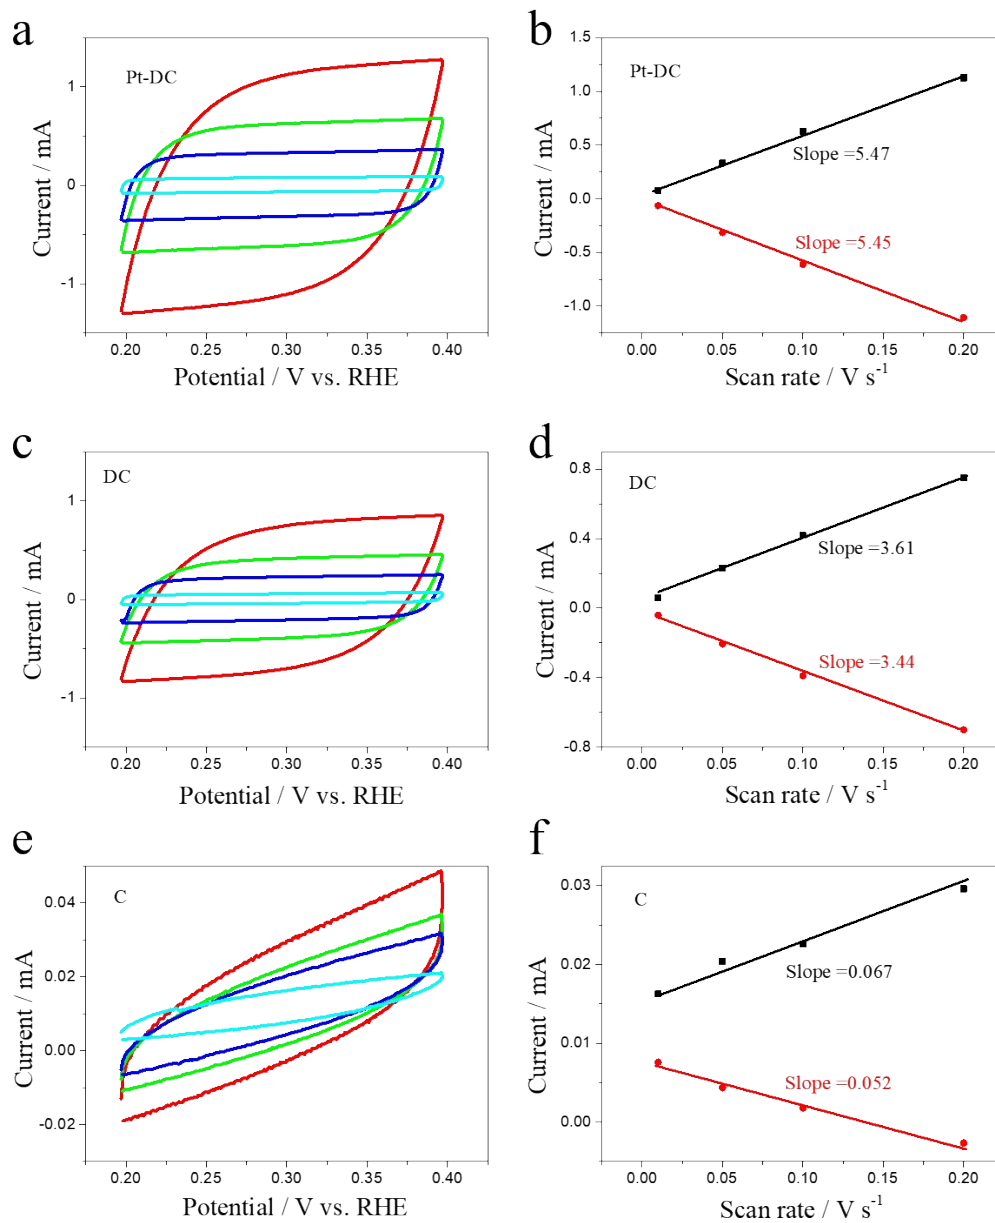

**Figure 5.** Cyclic voltammetry tests of (a) Pt-DC, (B) DC and (c) C at different scan rates in a non-Faradaic region, and the corresponding relationship of current and scan rate (b, d and f) for the calculation of the electrochemical double-layer capacitance ( $C_{dl}$ ).

**Table 1.** Acidic HER performance comparison of different noble metal-based catalysts.

| Electrocatalyst                     | Noble metal loading (mg cm <sup>-2</sup> ) | Overpotential@10 mA cm <sup>-2</sup> (mV) | Overpotential at other currents     | Tafel slope (mV dec <sup>-1</sup> ) | Reference                          |
|-------------------------------------|--------------------------------------------|-------------------------------------------|-------------------------------------|-------------------------------------|------------------------------------|
| <b>Pt-DC</b>                        | <b>0.00416</b>                             | <b>25</b>                                 | <b>55 mV@100 mA cm<sup>-2</sup></b> | <b>30</b>                           | <b>This work</b>                   |
| <b>Ru/triNC</b>                     | 0.0479                                     | 2                                         | 25 mV@35 mA cm <sup>-2</sup>        | 32.1                                | Adv. Energy Mater., 2020, 2000067. |
| <b>RuNP@PDA</b>                     | 0.0476                                     | 27.5                                      | 160 mV@100 mA cm <sup>-2</sup> #    | 37                                  | ACS Catal., 2018, 8, 5714.         |
| <b>Ru/GDY</b>                       | 0.00475                                    | 44                                        | 125 mV@100 mA cm <sup>-2</sup> #    | 30                                  | Nano Energy, 72, 104667            |
| <b>Ir-NSG</b>                       | 0.025                                      | 27 <sup>#</sup>                           | 33 mV@30 mA cm <sup>-2</sup> #      | 19.2                                | Nat. Commun., 2020, 11, 4246.      |
| <b>Ir-SA@Fe@NCNT</b>                | 0.0011                                     | 26                                        | 85 mV@100 mA cm <sup>-2</sup> #     | 31.8                                | Nano Lett., 2020, 20, 2120.        |
| <b>RuB<sub>2</sub></b>              | 0.47                                       | 52                                        | 52 mV@50 mA cm <sup>-2</sup>        | 66.9                                | ACS Energy Lett., 2020, 5, 2909.   |
| <b>Rh<sub>3</sub>Cu<sub>1</sub></b> | 0.0249                                     | -                                         | 80 mV@90 mA cm <sup>-2</sup> #      | 33                                  | Adv. Energy Mater., 2020, 1903038. |
| <b>Li-IrSe<sub>2</sub></b>          | 0.137                                      | 225                                       | 75 mV@40 mA                         | -                                   | Angew.                             |

|                                                      |        |    |                                     |      |  |                               |
|------------------------------------------------------|--------|----|-------------------------------------|------|--|-------------------------------|
|                                                      |        |    | $\text{cm}^{-2}\#$                  |      |  | Chem. Inter. Ed., 58, 14764.  |
| <b>RuTe<sub>2</sub></b>                              | 0.0575 | 38 | 60 mV@25 mA<br>$\text{cm}^{-2}\#$   | -    |  | Nat. Commun., 2019, 10, 5692. |
| <b>Pt<sub>62</sub>Co<sub>23</sub>Ir<sub>15</sub></b> | 0.0103 | 14 | 17 mV@40 mA<br>$\text{cm}^{-2}\#$   | -    |  | Chem. Mater., 2019, 31, 8136. |
| <b>Co-RuIr</b>                                       | 0.0423 | 14 | 23 mV@17.5 mA<br>$\text{cm}^{-2}\#$ | 31.1 |  | Adv. Mater., 2019, 1900510.   |
| <b>IrNi</b>                                          | 0.0078 | 25 | 32 mV@20 mA<br>$\text{cm}^{-2}\#$   | 29.7 |  | Small Methods, 2019, 1900129. |

#: data were read from figures in literature.
